# Supplementary material
Source: publisher figshare collection journal article supplement (https://future-science-group.figshare.com/ndownloader/files/28562337)
Supplement: Supplementary file 1 [file 28562337]

## Sheet: Supplementary table 1
Supplementary Table 1: Characteristics of the set of DNA libraries of the proof-of-principle experiment. Summary statistics of the shotgun data obtained from temperature-controlled gradual DNA extraction from two ancient bone samples.
Specimen	Reference genome	Library ID	Gradual extraction fraction	Fraction of lysate used for DNA extraction	Sample amount (mg)	# Library molecules (qPCR measurement)	# Sequences generated	# Fragments ≥35 bp	# Mapped fragments (≥35 bp, MQ≥25)	% Mapped (endogenous) fragments (≥35 bp, MQ≥25)	5’ C→T [95% CI]	3’ C → T [95% CI]	Average size, all fragments (bp)	Informative sequence content in lysate (Mbp)
Whale bone, North Sea	turTru1.75	F9673	21°C 1st Treatment	0.2	76.6	21898750000	2806718	1139977	378	0.0331586	40 [29.2-51.6]	19.4 [10.8-30.9]	45.8	675.379
		F9674	21°C 2nd Treatment	0.2		7285000000	3826068	1152136	480	0.0416617	34.9 [24.8-46.2]	24.1 [15.6-34.5]	44.3	202.438
		F9675	37°C 1st Treatment	0.2		5931250000	2588115	1032483	668	0.0646984	33.9 [25.1-43.6]	33 [23.8-43.3]	44.3	339.088
		F9676	37°C 2nd Treatment	0.2		2593875000	3102110	965879	702	0.0726799	33.8 [26.1-42.2]	28.5 [21.3-36.6]	44.3	130.018
		F9677	60°C 1st Treatment	0.2		3723750000	3330736	1572835	2173	0.138158	41 [36.3-45.8]	29.5 [25.0-34.3]	44.1	535.684
		F9678	60°C 2nd Treatment	0.2		1514750000	3228941	1039048	2421	0.233002	39.5 [35.2-43.9]	31.1 [27.0-35.4]	44.2	250.997
		F9679	70°C 1st Treatment	0.2		1026375000	3560074	1235277	4774	0.386472	39.2 [36.1-42.4]	33.3 [30.2-36.5]	44.6	306.926
		F9680	70°C 2nd Treatment	0.2		583750000	4631067	1069015	6867	0.642367	40.4 [37.8-43.1]	32.6 [30.0-35.3]	44.3	191.728
		F9681	80°C 1st Treatment	0.2		1015000000	3756635	1611928	7899	0.490034	39.1 [36.7-41.6]	32.1 [29.7-34.6]	44.7	476.998
		F9682	80°C 2nd Treatment	0.2		454125000	3484288	853818	8684	1.01708	39.8 [37.5-42.1]	32.2 [30.0-34.6]	44.8	253.53
		F9683	90°C 1st Treatment	0.2		1799000000	2799282	1387653	8080	0.582278	39 [36.7-41.4]	33.3 [30.9-35.7]	45	1168.36
		F9684	90°C 2nd Treatment	0.2		421375000	3726712	953332	15767	1.65388	40.9 [39.1-42.6]	34.5 [32.8-36.2]	44.3	394.881
		F9685	Final Pellet	1		700875000	4009319	1605946	243321	15.1513	37.5 [37.1-37.9]	29.4 [29.0-29.9]	49.7	2114
Bovid bone, Denisova Cave	bosTau8	F9708	21°C 1st Treatment	0.2	52.6	33700000000	3558444	366085	5692	1.55483	48.8 [46.1-51.6]	38.9 [36.0-42.0]	44.5	11994
		F9709	21°C 2nd Treatment	0.2		4196250000	3916331	132787	2133	1.60633	49 [44.2-53.8]	36.4 [31.6-41.4]	43.1	492.516
		F9710	37°C 1st Treatment	0.2		8452500000	2894157	206617	4478	2.1673	45.6 [42.5-48.8]	40.9 [37.5-44.3]	44.8	2929.51
		F9711	37°C 2nd Treatment	0.2		3395000000	3182493	91866	2202	2.39697	50.8 [46.3-55.3]	36.1 [31.5-40.8]	42.4	497.996
		F9712	60°C 1st Treatment	0.2		15325000000	3405137	310939	8550	2.74974	51.9 [49.6-54.1]	39.4 [37.0-41.8]	46.2	8888.82
		F9716	60°C 2nd Treatment	0.2		6360000000	4063448	338482	8948	2.64357	50.8 [48.6-53.0]	40.6 [38.2-43.0]	45.8	3207.18
		F9717	70°C 1st Treatment	0.2		6943750000	242317	22178	779	3.51249	48.4 [40.9-55.9]	36.6 [28.4-45.5]	45.2	5044.94
		F9718	70°C 2nd Treatment	0.2		2414125000	62175	5979	196	3.27814	51.2 [35.5-66.7]	41.3 [27.0-56.8]	46.2	1757.97
		F9719	80°C 1st Treatment	0.2		3931250000	675849	79307	4705	5.93264	53.3 [50.2-56.4]	41 [37.7-44.3]	45.7	6253.55
		F9720	80°C 2nd Treatment	0.2		1804125000	3284635	417127	21951	5.26243	50.4 [49.0-51.8]	39.5 [38.0-41.0]	46.4	2797.19
		F9721	90°C 1st Treatment	0.2		2633750000	1172250	306417	18217	5.94517	50.5 [49.0-52.0]	38.9 [37.3-40.5]	48.9	10007.1
		F9722	90°C 2nd Treatment	0.2		728875000	738979	121155	6502	5.36668	47.5 [45.0-50.0]	41.5 [38.7-44.3]	49.2	1577.62
		F9723	Final Pellet	1		409000000	2245642	381246	10780	2.82757	52 [50.0-54.0]	38 [35.8-40.2]	48.2	94.6343
bp = base pairs, Mbp = mega base pairs, MQ = map quality, CI = 95% binomial confidence interval
